# Supplementary material for: Demographics and Outcomes of Extracorporeal Membrane Oxygenation in COVID-19 Patients: National Database Analysis
Source: MDPI journal article supplement (doi:10.3390/jcm12186013), 2023-09-16
Supplement: s1 [file s1]

**Supplemental table S1: ICD-10 Codes used to generate analysis.**

| <b>Variable</b>        | <b>Codes</b>                                     |
|------------------------|--------------------------------------------------|
| COVID                  | U071                                             |
| ECMO                   | 5A1522H, 5A1522G, 5A15A2G, 5A15A2H, 5A152, 5A15A |
| Mechanical Ventilation | 5A1935Z, 5A1945Z, 5A1955Z                        |
| CHF                    | I50, I110, I130                                  |
| CPD                    | J40, J41, J42, J43, J44, J45, J47, J84           |
| Smoking                | F172, Z720, Z87891                               |
| DM                     | E11                                              |
| CKD                    | N18                                              |
| Obesity                | Z683, Z6841, Z6842, Z6843, Z6844, Z6845          |
| CAD                    | I25                                              |
| Sepsis                 | A41                                              |
| Shock                  | R57, R6521                                       |
| Blood transfusion      | 302                                              |
